# Supplementary material
Source: Research Square preprint supplement (doi:10.21203/rs.3.rs-8936533/v1)
Supplement: Supplementary file 1 [file b9060d8483c86cdb31da83cb.xlsx]

## Sheet: raw data and calculate
Province	Region	Year	Number of rehabilitation institutions for disabled persons	Rehabilitation talents	Regional population (10000 people)	Geographical area (10000 square kilometers)	Number of institutions (per 10000 population)	Number of institutions (per 10000 square kilometers)	H*I	Rehabilitation institution HRDI	Rehabilitation talents (per 10000 talents)	Rehabilitation talents (per 10000 square kilometers)	L*M	Rehabilitation talents HRDI
Beijing	Eastern	2016	128	4312	2195	1.7	0.0583144	75.2941	4.39073	2.09541	1.96446	2536.47	4982.81	70.589
Beijing	Eastern	2017	130	3928	2194	1.7	0.0592525	76.4706		2.12863	1.79034	2310.59	4136.73	64.3174
Beijing	Eastern	2018	127	3774	2192	1.7	0.057938	74.7059		2.08046	1.72172	2220	3822.21	61.824
Beijing	Eastern	2019	148	4216	2190	1.7	0.0675799	87.0588		2.42558	1.92511	2480	4774.28	69.0962
Beijing	Eastern	2020	151	4014	2189	1.7	0.0689813	88.8235		2.47531	1.83371	2361.18	4329.72	65.8006
Beijing	Eastern	2021	168	3842	2189	1.7	0.0767474	98.8235		2.75399	1.75514	2260	3966.61	62.9811
Beijing	Eastern	2022	173	3617	2184	1.7	0.0792125	101.765		2.8392	1.65614	2127.65	3523.67	59.3605
Beijing	Eastern	2023	178	4010	2186	1.7	0.0814273	104.706		2.91992	1.8344	2358.82	4327.03	65.7801
Tianjin	Eastern	2016	69	3206	1443	1.2	0.047817	57.5		1.65816	2.22176	2671.67	5935.8	77.0442
Tianjin	Eastern	2017	71	3292	1410	1.2	0.0503546	59.1667		1.72607	2.33475	2743.33	6405	80.0313
Tianjin	Eastern	2018	89	2228	1383	1.2	0.0643529	74.1667		2.18468	1.61099	1856.67	2991.07	54.6907
Tianjin	Eastern	2019	94	2293	1385	1.2	0.06787	78.3333		2.30575	1.6556	1910.83	3163.57	56.2456
Tianjin	Eastern	2020	95	2441	1387	1.2	0.0684932	79.1667		2.3286	1.75991	2034.17	3579.96	59.8327
Tianjin	Eastern	2021	99	2851	1373	1.2	0.0721049	82.5		2.43899	2.07647	2375.83	4933.36	70.2379
Tianjin	Eastern	2022	99	2853	1363	1.2	0.0726339	82.5		2.44792	2.09318	2377.5	4976.53	70.5445
Tianjin	Eastern	2023	110	3023	1364	1.2	0.0806452	91.6667		2.71891	2.21628	2519.17	5583.17	74.7206
Hebei	Eastern	2016	377	10671	7375	19	0.0511186	19.8421		1.00713	1.44692	561.632	812.633	28.5067
Hebei	Eastern	2017	439	13071	7409	19	0.0592523	23.1053		1.17006	1.76421	687.947	1213.68	34.8379
Hebei	Eastern	2018	431	12570	7426	19	0.0580393	22.6842		1.14742	1.6927	661.579	1119.86	33.4642
Hebei	Eastern	2019	435	12605	7447	19	0.0584128	22.8947		1.15644	1.69263	663.421	1122.92	33.5101
Hebei	Eastern	2020	444	12364	7464	19	0.0594855	23.3684		1.17902	1.65648	650.737	1077.94	32.8319
Hebei	Eastern	2021	505	13768	7448	19	0.0678034	26.5789		1.34244	1.84855	724.632	1339.52	36.5994
Hebei	Eastern	2022	572	15398	7420	19	0.0770889	30.1053		1.52341	2.0752	810.421	1681.79	41.0096
Hebei	Eastern	2023	698	18731	7393	19	0.0944136	36.7368		1.86238	2.53361	985.842	2497.74	49.9774
Shanxi	C	2016	205	7552	3514	16	0.0583381	12.8125		0.864556	2.14912	472	1014.38	31.8494
Shanxi	C	2017	308	10306	3510	16	0.0877493	19.25		1.29968	2.93618	644.125	1891.27	43.4887
Shanxi	C	2018	327	9784	3502	16	0.0933752	20.4375		1.38143	2.79383	611.5	1708.43	41.3331
Shanxi	C	2019	350	11010	3497	16	0.100086	21.875		1.47965	3.14841	688.125	2166.5	46.5457
Shanxi	C	2020	317	11009	3490	16	0.0908309	19.8125		1.34149	3.15444	688.062	2170.45	46.5881
Shanxi	C	2021	291	9629	3480	16	0.0836207	18.1875		1.23323	2.76695	601.812	1665.19	40.8067
Shanxi	C	2022	286	9748	3481	16	0.0821603	17.875		1.21186	2.80034	609.25	1706.11	41.3051
Shanxi	C	2023	309	9912	3466	16	0.0891518	19.3125		1.31215	2.85978	619.5	1771.63	42.0908
Inner Mongolia	W	2016	208	4618	2436	118	0.0853859	1.76271		0.387957	1.89573	39.1356	74.1905	8.61339
Inner Mongolia	W	2017	223	5859	2433	118	0.0916564	1.88983		0.416191	2.40814	49.6525	119.57	10.9348
Inner Mongolia	W	2018	211	5067	2422	118	0.0871181	1.78814		0.394688	2.09207	42.9407	89.835	9.47813
Inner Mongolia	W	2019	230	5543	2415	118	0.0952381	1.94915		0.430852	2.29524	46.9746	107.818	10.3835
Inner Mongolia	W	2020	272	6104	2403	118	0.113192	2.30508		0.5108	2.54016	51.7288	131.399	11.463
Inner Mongolia	W	2021	293	7410	2400	118	0.122083	2.48305		0.550581	3.0875	62.7966	193.885	13.9242
Inner Mongolia	W	2022	293	7187	2401	118	0.122032	2.48305		0.550466	2.99334	60.9068	182.314	13.5024
Inner Mongolia	W	2023	286	7163	2396	118	0.119366	2.42373		0.537875	2.98957	60.7034	181.477	13.4713
Liaoning	Eastern	2016	265	8099	4327	15	0.0612434	17.6667		1.04018	1.87174	539.933	1010.61	31.7901
Liaoning	Eastern	2017	362	12038	4312	15	0.0839518	24.1333		1.42339	2.79174	802.533	2240.47	47.3336
Liaoning	Eastern	2018	376	9682	4291	15	0.0876253	25.0667		1.48205	2.25635	645.467	1456.4	38.1628
Liaoning	Eastern	2019	398	10950	4277	15	0.0930559	26.5333		1.57133	2.56021	730	1868.95	43.2314
Liaoning	Eastern	2020	416	11623	4255	15	0.0977673	27.7333		1.64664	2.73161	774.867	2116.63	46.0069
Liaoning	Eastern	2021	405	10970	4229	15	0.0957673	27		1.60802	2.59399	731.333	1897.07	43.5554
Liaoning	Eastern	2022	462	9943	4197	15	0.110079	30.8		1.84131	2.36907	662.867	1570.38	39.628
Liaoning	Eastern	2023	480	9941	4182	15	0.114778	32		1.91648	2.37709	662.733	1575.38	39.691
Jilin	C	2016	263	10182	2567	19	0.102454	13.8421		1.19087	3.9665	535.895	2125.63	46.1045
Jilin	C	2017	213	9050	2526	19	0.084323	11.2105		0.972268	3.58274	476.316	1706.52	41.31
Jilin	C	2018	294	11225	2484	19	0.118357	15.4737		1.3533	4.51892	590.789	2669.73	51.6694
Jilin	C	2019	289	9185	2448	19	0.118056	15.2105		1.34003	3.75204	483.421	1813.82	42.5889
Jilin	C	2020	286	9145	2399	19	0.119216	15.0526		1.3396	3.81201	481.316	1834.78	42.8343
Jilin	C	2021	271	9301	2375	19	0.114105	14.2632		1.27574	3.91621	489.526	1917.09	43.7846
Jilin	C	2022	243	8042	2348	19	0.103492	12.7895		1.15048	3.42504	423.263	1449.69	38.0749
Jilin	C	2023	238	8011	2339	19	0.101753	12.5263		1.12898	3.42497	421.632	1444.07	38.001
Heilongjiang	C	2016	155	4346	3463	46	0.0447589	3.36957		0.388353	1.25498	94.4783	118.568	10.8889
Heilongjiang	C	2017	165	4750	3399	46	0.0485437	3.58696		0.417282	1.39747	103.261	144.304	12.0127
Heilongjiang	C	2018	252	6130	3327	46	0.0757439	5.47826		0.644162	1.8425	133.261	245.533	15.6695
Heilongjiang	C	2019	273	5429	3255	46	0.083871	5.93478		0.705518	1.6679	118.022	196.848	14.0303
Heilongjiang	C	2020	279	5913	3171	46	0.0879849	6.06522		0.730512	1.86471	128.543	239.696	15.4821
Heilongjiang	C	2021	261	5983	3125	46	0.08352	5.67391		0.688393	1.91456	130.065	249.018	15.7803
Heilongjiang	C	2022	271	5240	3099	46	0.0874476	5.8913		0.717761	1.69087	113.913	192.612	13.8785
Heilongjiang	C	2023	265	5356	3062	46	0.0865447	5.76087		0.706097	1.74918	116.435	203.666	14.2712
Shanghai	Eastern	2016	1078	7712	2467	0.634	0.436968	1700.32		27.2577	3.12606	12164	38025.6	195.001
Shanghai	Eastern	2017	1081	9030	2466	0.634	0.438362	1705.05		27.3391	3.6618	14242.9	52154.7	228.374
Shanghai	Eastern	2018	1071	8956	2475	0.634	0.432727	1689.27		27.0369	3.61859	14126.2	51116.8	226.09
Shanghai	Eastern	2019	1080	8720	2481	0.634	0.435308	1703.47		27.2311	3.51471	13753.9	48341.1	219.866
Shanghai	Eastern	2020	1083	8808	2488	0.634	0.435289	1708.2		27.2683	3.54019	13892.7	49183	221.772
Shanghai	Eastern	2021	1073	8703	2489	0.634	0.431097	1692.43		27.0111	3.49658	13727.1	47998.1	219.085
Shanghai	Eastern	2022	956	7569	2475	0.634	0.386263	1507.89		24.1338	3.05818	11938.5	36510.1	191.076
Shanghai	Eastern	2023	948	8266	2487	0.634	0.381182	1495.27		23.874	3.32368	13037.9	43333.7	208.167
Jiangsu	Eastern	2016	383	11409	8381	10	0.0456986	38.3		1.32297	1.36129	1140.9	1553.1	39.4094
Jiangsu	Eastern	2017	421	11377	8423	10	0.0499822	42.1		1.4506	1.35071	1137.7	1536.7	39.2007
Jiangsu	Eastern	2018	435	13677	8446	10	0.0515037	43.5		1.4968	1.61935	1367.7	2214.78	47.0615
Jiangsu	Eastern	2019	465	13513	8469	10	0.0549061	46.5		1.59785	1.59558	1351.3	2156.11	46.434
Jiangsu	Eastern	2020	473	13973	8477	10	0.055798	47.3		1.62458	1.64834	1397.3	2303.23	47.992
Jiangsu	Eastern	2021	505	15014	8505	10	0.0593768	50.5		1.73163	1.76531	1501.4	2650.44	51.4825
Jiangsu	Eastern	2022	530	15361	8515	10	0.0622431	53		1.81628	1.80399	1536.1	2771.11	52.6414
Jiangsu	Eastern	2023	546	15844	8526	10	0.0640394	54.6		1.86991	1.85832	1584.4	2944.32	54.2615
Zhejiang	Eastern	2016	183	4849	6072	10	0.0301383	18.3		0.742652	0.798584	484.9	387.233	19.6782
Zhejiang	Eastern	2017	190	5735	6170	10	0.0307942	19		0.764911	0.929498	573.5	533.067	23.0882
Zhejiang	Eastern	2018	206	6434	6273	10	0.0328392	20.6		0.822488	1.02567	643.4	659.913	25.6888
Zhejiang	Eastern	2019	223	7212	6375	10	0.0349804	22.3		0.883212	1.13129	721.2	815.889	28.5638
Zhejiang	Eastern	2020	252	8822	6468	10	0.038961	25.2		0.990867	1.36395	882.2	1203.27	34.6882
Zhejiang	Eastern	2021	299	12192	6540	10	0.0457187	29.9		1.16918	1.86422	1219.2	2272.86	47.6745
Zhejiang	Eastern	2022	314	12646	6577	10	0.0477421	31.4		1.22438	1.92276	1264.6	2431.52	49.3105
Zhejiang	Eastern	2023	334	13511	6627	10	0.0503999	33.4		1.29744	2.03878	1351.1	2754.6	52.4843
Anhui	C	2016	214	5073	6033	14	0.0354716	15.2857		0.736348	0.840875	362.357	304.697	17.4556
Anhui	C	2017	228	5914	6057	14	0.0376424	16.2857		0.782964	0.976391	422.429	412.455	20.309
Anhui	C	2018	237	5800	6076	14	0.0390059	16.9286		0.812597	0.954575	414.286	395.467	19.8864
Anhui	C	2019	288	7357	6092	14	0.0472751	20.5714		0.986163	1.20765	525.5	634.62	25.1917
Anhui	C	2020	295	8570	6105	14	0.048321	21.0714		1.00906	1.40377	612.143	859.306	29.3139
Anhui	C	2021	304	9979	6113	14	0.0497301	21.7143		1.03916	1.63242	712.786	1163.57	34.1111
Anhui	C	2022	309	10877	6127	14	0.0504325	22.0714		1.05504	1.77526	776.929	1379.25	37.1382
Anhui	C	2023	332	11488	6121	14	0.0542395	23.7143		1.13413	1.87682	820.571	1540.06	39.2436
Fujian	Eastern	2016	248	5203	4016	12	0.061753	20.6667		1.1297	1.29557	433.583	561.737	23.701
Fujian	Eastern	2017	253	6212	4065	12	0.0622386	21.0833		1.14551	1.52817	517.667	791.081	28.1262
Fujian	Eastern	2018	274	6244	4104	12	0.0667641	22.8333		1.23469	1.52144	520.333	791.657	28.1364
Fujian	Eastern	2019	317	7431	4137	12	0.0766256	26.4167		1.42274	1.79623	619.25	1112.31	33.3514
Fujian	Eastern	2020	350	10123	4161	12	0.0841144	29.1667		1.56631	2.43283	843.583	2052.29	45.3022
Fujian	Eastern	2021	388	11592	4187	12	0.0926678	32.3333		1.73097	2.76857	966	2674.44	51.715
Fujian	Eastern	2022	394	12282	4188	12	0.0940783	32.8333		1.75753	2.93266	1023.5	3001.58	54.7867
Fujian	Eastern	2023	422	10431	4183	12	0.100885	35.1667		1.88355	2.49366	869.25	2167.62	46.5577
Jiangxi	C	2016	192	4822	4496	17	0.0427046	11.2941		0.694486	1.07251	283.647	304.214	17.4417
Jiangxi	C	2017	204	5184	4511	17	0.0452228	12		0.736664	1.14919	304.941	350.436	18.7199
Jiangxi	C	2018	210	5982	4513	17	0.0465322	12.3529		0.758162	1.3255	351.882	466.422	21.5968
Jiangxi	C	2019	239	6383	4516	17	0.0529229	14.0588		0.862574	1.41342	375.471	530.697	23.0369
Jiangxi	C	2020	293	7905	4519	17	0.0648374	17.2353		1.05711	1.74928	465	813.416	28.5204
Jiangxi	C	2021	314	7472	4517	17	0.0695152	18.4706		1.13313	1.6542	439.529	727.067	26.9642
Jiangxi	C	2022	316	8221	4528	17	0.069788	18.5882		1.13896	1.81559	483.588	877.999	29.631
Jiangxi	C	2023	323	8559	4515	17	0.0715393	19		1.16587	1.89568	503.471	954.42	30.8937
Shandong	Eastern	2016	644	25061	9973	16	0.0645744	40.25		1.61218	2.51288	1566.31	3935.96	62.7373
Shandong	Eastern	2017	552	25505	10033	16	0.0550184	34.5		1.37773	2.54211	1594.06	4052.28	63.6576
Shandong	Eastern	2018	564	22291	10077	16	0.055969	35.25		1.4046	2.21207	1393.19	3081.82	55.5142
Shandong	Eastern	2019	659	25538	10106	16	0.0652088	41.1875		1.63884	2.52701	1596.12	4033.43	63.5093
Shandong	Eastern	2020	870	31264	10165	16	0.0855878	54.375		2.15728	3.07565	1954	6009.82	77.5231
Shandong	Eastern	2021	1219	37902	10170	16	0.119862	76.1875		3.02192	3.72684	2368.88	8828.43	93.9597
Shandong	Eastern	2022	1438	43692	10163	16	0.141494	89.875		3.56605	4.29912	2730.75	11739.8	108.351
Shandong	Eastern	2023	1888	66798	10123	16	0.186506	118		4.69124	6.59864	4174.88	27548.5	165.977
Henan	C	2016	316	14618	9778	17	0.0323174	18.5882		0.775064	1.49499	859.882	1285.51	35.8541
Henan	C	2017	364	16328	9829	17	0.0370333	21.4118		0.890476	1.66121	960.471	1595.54	39.9442
Henan	C	2018	385	13729	9864	17	0.0390308	22.6471		0.940177	1.39183	807.588	1124.02	33.5265
Henan	C	2019	463	15412	9901	17	0.046763	27.2353		1.12854	1.55661	906.588	1411.2	37.566
Henan	C	2020	498	17562	9941	17	0.0500956	29.2941		1.21141	1.76662	1033.06	1825.03	42.7203
Henan	C	2021	534	18362	9883	17	0.0540322	31.4118		1.30278	1.85794	1080.12	2006.79	44.7972
Henan	C	2022	546	17528	9872	17	0.0553079	32.1176		1.3328	1.77553	1031.06	1830.67	42.7864
Henan	C	2023	569	18874	9815	17	0.0579725	33.4706		1.39297	1.92298	1110.24	2134.95	46.2056
Hubei	C	2016	233	11805	5885	19	0.0395922	12.2632		0.696796	2.00595	621.316	1246.33	35.3034
Hubei	C	2017	220	9123	5904	19	0.0372629	11.5789		0.65686	1.54522	480.158	741.951	27.2388
Hubei	C	2018	214	7256	5917	19	0.036167	11.2632		0.638243	1.2263	381.895	468.316	21.6406
Hubei	C	2019	234	7130	5927	19	0.0394803	12.3158		0.697303	1.20297	375.263	451.43	21.2469
Hubei	C	2020	254	8403	5745	19	0.0442124	13.3684		0.768797	1.46266	442.263	646.882	25.4339
Hubei	C	2021	272	9696	5830	19	0.0466552	14.3158		0.817255	1.66312	510.316	848.717	29.1328
Hubei	C	2022	273	8944	5844	19	0.0467146	14.3684		0.819277	1.53046	470.737	720.443	26.8411
Hubei	C	2023	297	9884	5838	19	0.0508736	15.6316		0.891759	1.69305	520.211	880.74	29.6773
Hunan	C	2016	306	12225	6625	21	0.0461887	14.5714		0.820387	1.84528	582.143	1074.22	32.7753
Hunan	C	2017	374	11682	6633	21	0.0563847	17.8095		1.00209	1.76119	556.286	979.727	31.3006
Hunan	C	2018	401	12121	6635	21	0.0604371	19.0952		1.07427	1.82683	577.19	1054.43	32.4719
Hunan	C	2019	404	13266	6640	21	0.0608434	19.2381		1.0819	1.99789	631.714	1262.1	35.526
Hunan	C	2020	444	14109	6645	21	0.0668172	21.1429		1.18857	2.12325	671.857	1426.52	37.7693
Hunan	C	2021	478	16255	6622	21	0.0721836	22.7619		1.28181	2.4547	774.048	1900.05	43.5896
Hunan	C	2022	497	16458	6604	21	0.0752574	23.6667		1.33458	2.49213	783.714	1953.11	44.1941
Hunan	C	2023	500	16537	6568	21	0.0761267	23.8095		1.34631	2.51781	787.476	1982.72	44.5277
Guangdong	Eastern	2016	655	16704	11908	18	0.055005	36.3889		1.41477	1.40275	928	1301.76	36.0799
Guangdong	Eastern	2017	570	18037	12141	18	0.0469484	31.6667		1.2193	1.48563	1002.06	1488.68	38.5834
Guangdong	Eastern	2018	733	24871	12348	18	0.0593618	40.7222		1.55478	2.01417	1381.72	2783.03	52.7544
Guangdong	Eastern	2019	812	26289	12489	18	0.0650172	45.1111		1.7126	2.10497	1460.5	3074.31	55.4465
Guangdong	Eastern	2020	859	30771	12624	18	0.068045	47.7222		1.80202	2.4375	1709.5	4166.91	64.5516
Guangdong	Eastern	2021	997	31796	12684	18	0.078603	55.3889		2.08656	2.50678	1766.44	4428.09	66.5439
Guangdong	Eastern	2022	1036	31455	12657	18	0.0818519	57.5556		2.17049	2.48519	1747.5	4342.86	65.9004
Guangdong	Eastern	2023	991	31064	12706	18	0.0779946	55.0556		2.07221	2.44483	1725.78	4219.23	64.9556
Guangxi	W	2016	177	4137	4857	24	0.0364422	7.375		0.518422	0.85176	172.375	146.822	12.117
Guangxi	W	2017	220	6868	4907	24	0.0448339	9.16667		0.641075	1.39963	286.167	400.528	20.0132
Guangxi	W	2018	363	8700	4947	24	0.0733778	15.125		1.05349	1.75864	362.5	637.508	25.2489
Guangxi	W	2019	423	9476	4982	24	0.0849057	17.625		1.2233	1.90205	394.833	750.992	27.4042
Guangxi	W	2020	416	10349	5019	24	0.082885	17.3333		1.19861	2.06196	431.208	889.136	29.8184
Guangxi	W	2021	423	11383	5037	24	0.0839786	17.625		1.2166	2.25988	474.292	1071.84	32.739
Guangxi	W	2022	452	10989	5047	24	0.0895582	18.8333		1.29872	2.17733	457.875	996.946	31.5745
Guangxi	W	2023	465	11240	5027	24	0.0925005	19.375		1.33873	2.23593	468.333	1047.16	32.3598
Hainan	Eastern	2016	28	1039	957	3.4	0.0292581	8.23529		0.490866	1.08568	305.588	331.772	18.2146
Hainan	Eastern	2017	34	1258	972	3.4	0.0349794	10		0.591434	1.29424	370	478.868	21.8831
Hainan	Eastern	2018	34	1065	982	3.4	0.0346232	10		0.588415	1.08452	313.235	339.71	18.4312
Hainan	Eastern	2019	37	1584	995	3.4	0.0371859	10.8824		0.636137	1.59196	465.882	741.666	27.2335
Hainan	Eastern	2020	42	1550	1012	3.4	0.041502	12.3529		0.716011	1.53162	455.882	698.239	26.4242
Hainan	Eastern	2021	50	1472	1020	3.4	0.0490196	14.7059		0.849045	1.44314	432.941	624.794	24.9959
Hainan	Eastern	2022	62	3498	1027	3.4	0.06037	18.2353		1.04922	3.40604	1028.82	3504.21	59.1964
Hainan	Eastern	2023	64	2131	1043	3.4	0.0613615	18.8235		1.07473	2.04314	626.765	1280.57	35.7851
Chongqing	W	2016	222	7197	3110	8.2	0.0713826	27.0732		1.39016	2.31415	877.683	2031.09	45.0676
Chongqing	W	2017	262	7952	3144	8.2	0.0833333	31.9512		1.63175	2.52926	969.756	2452.77	49.5254
Chongqing	W	2018	265	7415	3163	8.2	0.0837812	32.3171		1.64547	2.34429	904.268	2119.87	46.042
Chongqing	W	2019	279	8148	3188	8.2	0.0875157	34.0244		1.72559	2.55583	993.659	2539.63	50.3947
Chongqing	W	2020	305	9188	3209	8.2	0.0950452	37.1951		1.88022	2.8632	1120.49	3208.18	56.6408
Chongqing	W	2021	310	9355	3212	8.2	0.0965131	37.8049		1.91015	2.91252	1140.85	3322.75	57.6433
Chongqing	W	2022	300	9650	3213	8.2	0.0933707	36.5854		1.84824	3.00342	1176.83	3534.52	59.4518
Chongqing	W	2023	297	10018	3191	8.2	0.0930743	36.2195		1.83606	3.13945	1221.71	3835.49	61.9314
Sichuan	W	2016	242	11266	8251	49	0.0293298	4.93878		0.380596	1.36541	229.918	313.933	17.7182
Sichuan	W	2017	263	11394	8289	49	0.0317288	5.36735		0.412674	1.37459	232.531	319.635	17.8783
Sichuan	W	2018	278	10608	8321	49	0.0334094	5.67347		0.43537	1.27485	216.49	275.991	16.613
Sichuan	W	2019	305	9585	8351	49	0.0365226	6.22449		0.476796	1.14777	195.612	224.517	14.9839
Sichuan	W	2020	320	10116	8371	49	0.0382272	6.53061		0.499647	1.20846	206.449	249.485	15.7951
Sichuan	W	2021	330	10456	8372	49	0.0394171	6.73469		0.51523	1.24892	213.388	266.505	16.325
Sichuan	W	2022	365	13347	8374	49	0.0435873	7.44898		0.569808	1.59386	272.388	434.148	20.8362
Sichuan	W	2023	366	13151	8368	49	0.043738	7.46939		0.571574	1.57158	268.388	421.793	20.5376
Guizhou	W	2016	116	5741	3758	18	0.0308675	6.44444		0.446009	1.52767	318.944	487.243	22.0736
Guizhou	W	2017	185	8273	3803	18	0.0486458	10.2778		0.707086	2.17539	459.611	999.832	31.6201
Guizhou	W	2018	194	7014	3822	18	0.0507588	10.7778		0.73964	1.83516	389.667	715.103	26.7414
Guizhou	W	2019	241	9395	3848	18	0.0626299	13.3889		0.915721	2.44153	521.944	1274.34	35.6979
Guizhou	W	2020	257	9958	3858	18	0.0666148	14.2778		0.97525	2.58113	553.222	1427.94	37.7881
Guizhou	W	2021	270	9039	3852	18	0.0700935	15		1.02538	2.34657	502.167	1178.37	34.3274
Guizhou	W	2022	295	11022	3856	18	0.0765041	16.3889		1.11974	2.8584	612.333	1750.3	41.8365
Guizhou	W	2023	318	11024	3865	18	0.0822768	17.6667		1.20564	2.85226	612.444	1746.85	41.7954
Yunnan	W	2016	206	5987	4677	39	0.0440453	5.28205		0.482338	1.28009	153.513	196.511	14.0182
Yunnan	W	2017	240	7173	4693	39	0.05114	6.15385		0.560988	1.52845	183.923	281.117	16.7665
Yunnan	W	2018	257	6929	4703	39	0.054646	6.58974		0.600086	1.47331	177.667	261.759	16.179
Yunnan	W	2019	293	8671	4714	39	0.0621553	7.51282		0.683346	1.83941	222.333	408.963	20.2228
Yunnan	W	2020	297	10235	4722	39	0.0628971	7.61538		0.692088	2.16751	262.436	568.833	23.8502
Yunnan	W	2021	289	10939	4690	39	0.0616205	7.41026		0.675739	2.33241	280.487	654.211	25.5775
Yunnan	W	2022	279	10467	4693	39	0.0594502	7.15385		0.652149	2.23034	268.385	598.59	24.4661
Yunnan	W	2023	290	11669	4673	39	0.0620586	7.4359		0.67931	2.49711	299.205	747.148	27.334
Tibet	W	2016	3	60	340	120.28	0.00882353	0.0249418		0.0148349	0.176471	0.498836	0.0880299	0.296698
Tibet	W	2017	5	78	349	120.28	0.0143266	0.0415697		0.024404	0.223496	0.648487	0.144934	0.380702
Tibet	W	2018	6	63	354	120.28	0.0169492	0.0498836		0.0290772	0.177966	0.523778	0.0932147	0.305311
Tibet	W	2019	12	76	361	120.28	0.033241	0.0997672		0.0575879	0.210526	0.631859	0.133023	0.364723
Tibet	W	2020	11	75	366	120.28	0.0300546	0.0914533		0.0524271	0.204918	0.623545	0.127776	0.357457
Tibet	W	2021	11	80	366	120.28	0.0300546	0.0914533		0.0524271	0.218579	0.665115	0.14538	0.381288
Tibet	W	2022	11	97	364	120.28	0.0302198	0.0914533		0.0525709	0.266484	0.806452	0.214906	0.46358
Tibet	W	2023	21	116	365	120.28	0.0575342	0.174593		0.100225	0.317808	0.964416	0.306499	0.553624
Shaanxi	W	2016	303	7611	3874	21	0.0782137	14.4286		1.06231	1.96464	362.429	712.04	26.6841
Shaanxi	W	2017	316	9468	3904	21	0.0809426	15.0476		1.10363	2.4252	450.857	1093.42	33.0669
Shaanxi	W	2018	358	12597	3931	21	0.091071	17.0476		1.24601	3.20453	599.857	1922.26	43.8436
Shaanxi	W	2019	364	9510	3944	21	0.0922921	17.3333		1.2648	2.41126	452.857	1091.96	33.0447
Shaanxi	W	2020	342	8948	3955	21	0.0864728	16.2857		1.18671	2.26245	426.095	964.02	31.0487
Shaanxi	W	2021	347	10622	3954	21	0.0877592	16.5238		1.20421	2.68639	505.81	1358.8	36.862
Shaanxi	W	2022	346	10106	3956	21	0.0874621	16.4762		1.20043	2.5546	481.238	1229.37	35.0624
Shaanxi	W	2023	346	10039	3952	21	0.0875506	16.4762		1.20104	2.54023	478.048	1214.35	34.8476
Gansu	W	2016	120	2489	2520	43	0.047619	2.7907		0.364541	0.987698	57.8837	57.1717	7.56119
Gansu	W	2017	123	2474	2522	43	0.0487708	2.86047		0.373507	0.980967	57.5349	56.4399	7.51265
Gansu	W	2018	129	3094	2515	43	0.0512922	3		0.392271	1.23022	71.9535	88.5185	9.40843
Gansu	W	2019	166	3468	2509	43	0.0661618	3.86047		0.505386	1.38222	80.6512	111.478	10.5583
Gansu	W	2020	208	4695	2501	43	0.0831667	4.83721		0.634267	1.87725	109.186	204.969	14.3168
Gansu	W	2021	211	4292	2490	43	0.084739	4.90698		0.644835	1.72369	99.814	172.049	13.1167
Gansu	W	2022	209	4423	2492	43	0.0838684	4.86047		0.638466	1.77488	102.86	182.565	13.5117
Gansu	W	2023	191	4593	2465	43	0.0774848	4.44186		0.586666	1.86329	106.814	199.025	14.1076
Qinghai	W	2016	33	562	582	72	0.056701	0.458333		0.161208	0.965636	7.80556	7.53732	2.74542
Qinghai	W	2017	35	489	586	72	0.059727	0.486111		0.170393	0.834471	6.79167	5.66745	2.38064
Qinghai	W	2018	31	405	587	72	0.0528109	0.430556		0.150791	0.689949	5.625	3.88096	1.97002
Qinghai	W	2019	33	477	590	72	0.0559322	0.458333		0.160111	0.808475	6.625	5.35614	2.31433
Qinghai	W	2020	59	2161	593	72	0.0994941	0.819444		0.285534	3.64418	30.0139	109.376	10.4583
Qinghai	W	2021	65	1620	594	72	0.109428	0.902778		0.314307	2.72727	22.5	61.3636	7.83349
Qinghai	W	2022	68	1414	595	72	0.114286	0.944444		0.328537	2.37647	19.6389	46.6712	6.83164
Qinghai	W	2023	68	1446	594	72	0.114478	0.944444		0.328813	2.43434	20.0833	48.8897	6.99212
Ningxia	W	2016	29	582	695	6.6	0.0417266	4.39394		0.428187	0.83741	88.1818	73.8443	8.59327
Ningxia	W	2017	29	585	705	6.6	0.0411348	4.39394		0.42514	0.829787	88.6364	73.5493	8.57609
Ningxia	W	2018	30	567	710	6.6	0.0422535	4.54545		0.438248	0.798592	85.9091	68.6063	8.28289
Ningxia	W	2019	35	642	717	6.6	0.0488145	5.30303		0.508788	0.895397	97.2727	87.0978	9.33262
Ningxia	W	2020	42	986	721	6.6	0.0582524	6.36364		0.608849	1.36755	149.394	204.303	14.2935
Ningxia	W	2021	52	1691	725	6.6	0.0717241	7.87879		0.751731	2.33241	256.212	597.593	24.4457
Ningxia	W	2022	53	1751	728	6.6	0.0728022	8.0303		0.764607	2.40522	265.303	638.112	25.2609
Ningxia	W	2023	56	1650	729	6.6	0.0768176	8.48485		0.807332	2.26337	250	565.844	23.7875
Xinjiang	W	2016	152	2248	2428	166	0.062603	0.915663		0.239423	0.925865	13.5422	12.5382	3.54093
Xinjiang	W	2017	134	1955	2480	166	0.0540323	0.807229		0.208845	0.788306	11.7771	9.28397	3.04696
Xinjiang	W	2018	148	2486	2520	166	0.0587302	0.891566		0.228827	0.986508	14.9759	14.7738	3.84368
Xinjiang	W	2019	151	2282	2559	166	0.0590074	0.909639		0.23168	0.891755	13.747	12.2589	3.50128
Xinjiang	W	2020	176	2564	2590	166	0.0679537	1.06024		0.268416	0.989961	15.4458	15.2907	3.91034
Xinjiang	W	2021	190	2969	2589	166	0.0733874	1.14458		0.289823	1.14677	17.8855	20.5107	4.52887
Xinjiang	W	2022	178	2797	2587	166	0.0688056	1.07229		0.271624	1.08118	16.8494	18.2171	4.26816
Xinjiang	W	2023	214	4329	2598	166	0.0823711	1.28916		0.325867	1.66628	26.0783	43.4538	6.59195
